# Supplementary material
Source: Research Square preprint supplement (doi:10.21203/rs.3.rs-9507966/v1)
Supplement: Supplementary file 1 [file cd0180c54738770f8a552475.docx]

**Supplement 1** DeLong test results for pairwise AUC comparisons

| Model 1 | Model 2 | Z statistic | P value |
| --- | --- | --- | --- |
| LightGBM | XGBoost | 2.333 | 0.0196 |
| LightGBM | RandomForest | 2.132 | 0.033 |
| LightGBM | Logistic | 3.325 | <0.001 |
| LightGBM | SVM | 3.281 | 0.00103 |
| LightGBM | NeuralNet | 6.234 | <0.001 |
| LightGBM | DecisionTree | 6.851 | <0.001 |
| XGBoost | RandomForest | 0.992 | 0.321 |
| XGBoost | Logistic | 2.399 | 0.0165 |
| XGBoost | SVM | 2.835 | 0.00458 |
| XGBoost | NeuralNet | 5.701 | <0.001 |
| XGBoost | DecisionTree | 6.378 | <0.001 |
| RandomForest | Logistic | 1.248 | 0.212 |
| RandomForest | SVM | 2.263 | 0.0237 |
| RandomForest | NeuralNet | 5.006 | <0.001 |
| RandomForest | DecisionTree | 5.468 | <0.001 |
| Logistic | SVM | 0.977 | 0.329 |
| Logistic | NeuralNet | 4.432 | <0.001 |
| Logistic | DecisionTree | 4.423 | <0.001 |
| SVM | NeuralNet | 2.461 | 0.0138 |
| SVM | DecisionTree | 3.340 | <0.001 |
| NeuralNet | DecisionTree | 0.475 | 0.635 |
